# Supplementary material
Source: PubMed Central journal article supplement (PMC9672298)
Supplement: 12264_2022_914_MOESM1_ESM.pdf [file 12264_2022_914_MOESM1_ESM.pdf]

Supplemental Figures and Figure Legends

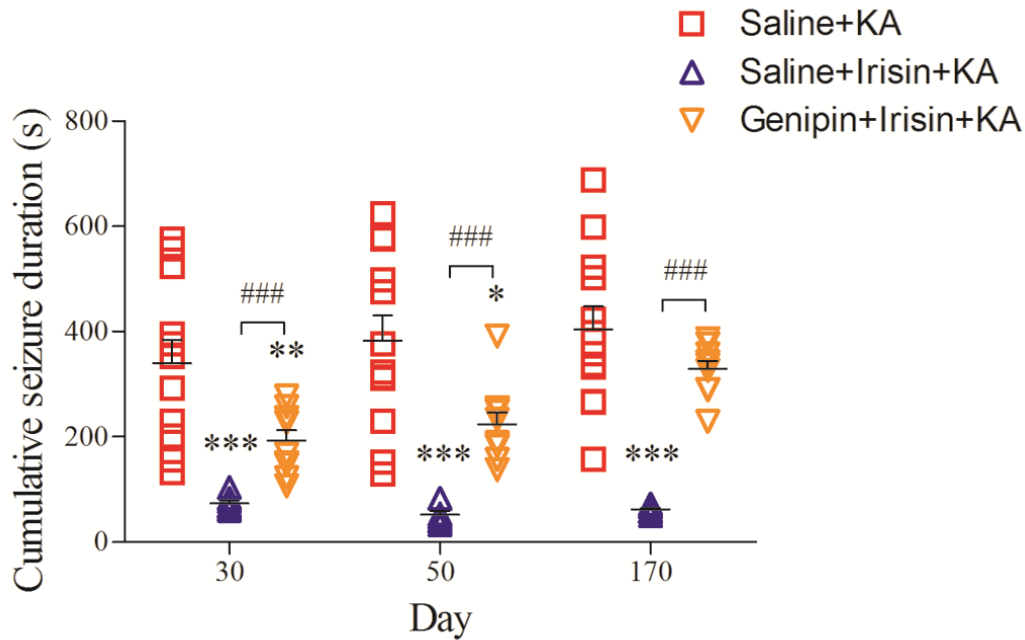

**Fig. S1** Cumulative seizure duration from EEG analysis in each group. \* $P < 0.05$ , \*\* $P < 0.01$ , \*\*\* $P < 0.001$  vs Saline+KA group; ### $P < 0.001$  vs each other (one-way ANOVA with Dunnett's T3 *post-hoc* test).

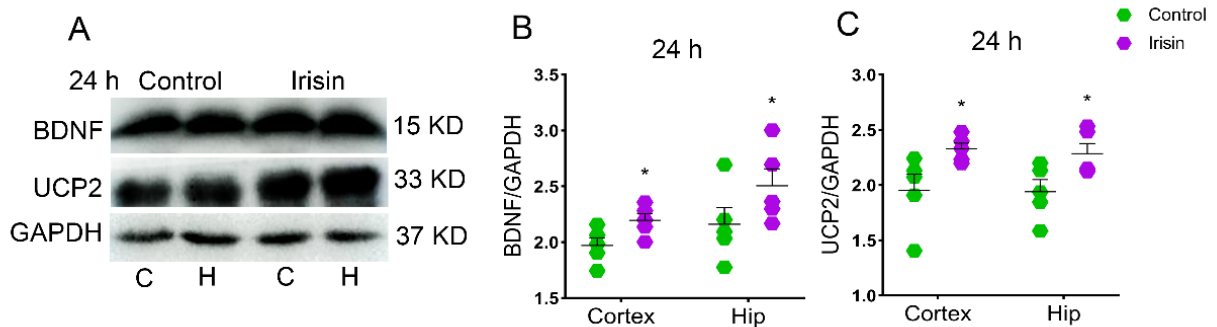

**Fig. S2 A–C** Levels of BDNF and UCP2 at 24 h in control and irisin groups ( $n = 5/\text{group}$ ). \* $P < 0.05$  vs control group (one-way ANOVA). C, cortex; H/Hip, hippocampus; BDNF, brain-derived neurotrophic factor; UCP2, uncoupling protein 2.

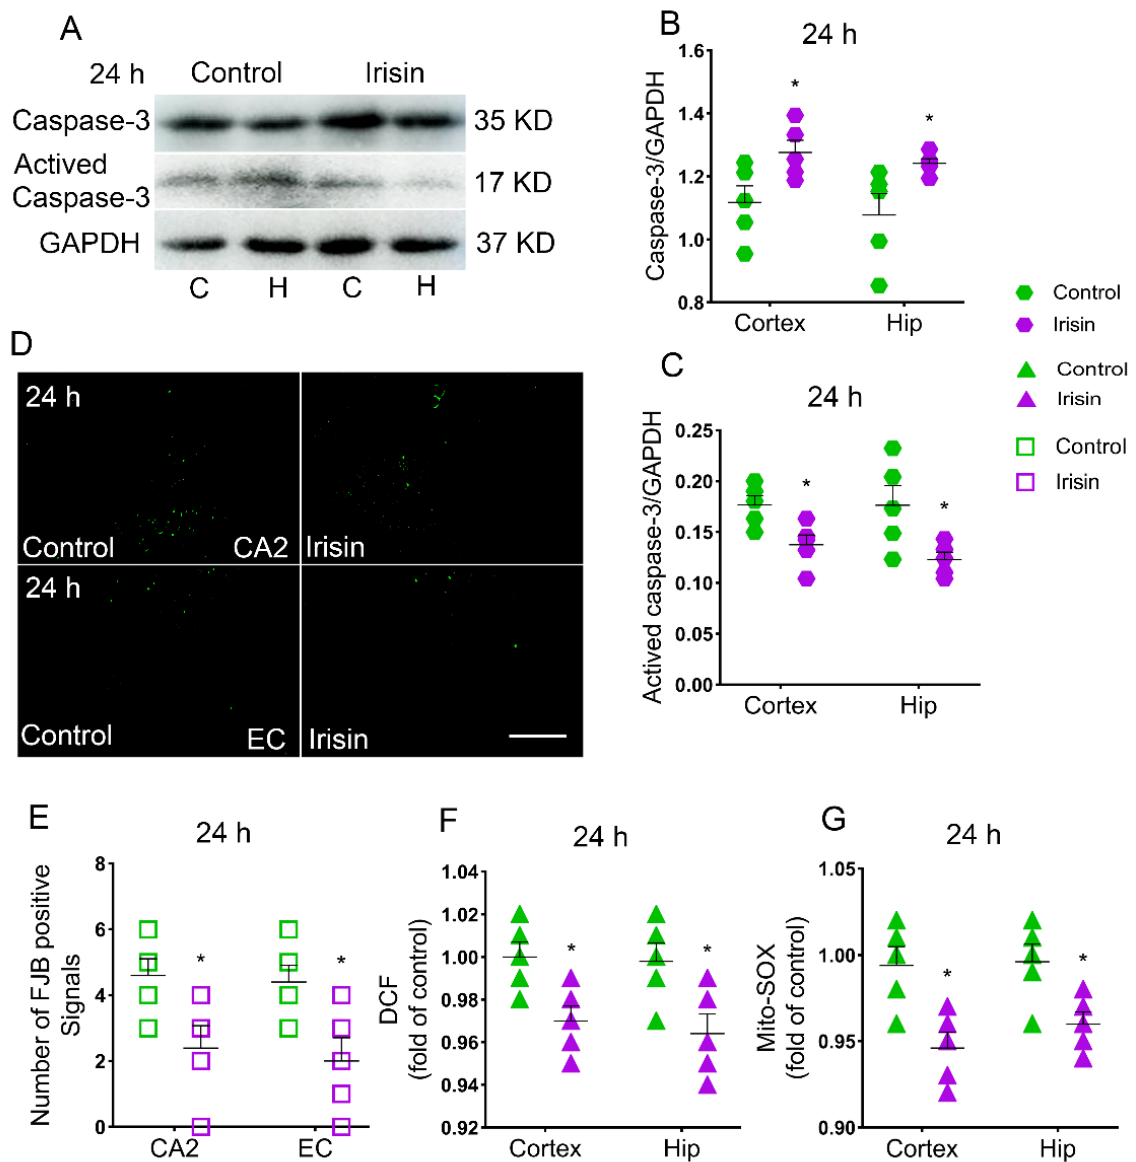

**Fig. S3 A–C** Levels of caspase-3 and activated caspase-3 at 24 h in control and irisin groups ( $n = 5/\text{group}$ ). **D–H** FJB signal patterns in CA2 and EC at 24 h ( $n = 5/\text{group}$ ; scale bar, 100  $\mu\text{m}$ ).  $*P < 0.05$  vs control group (one-way ANOVA). C, cortex; CA2, cornu ammonis 2; EC, entorhinal cortex; H/Hip, hippocampus; DCF, 2',7'-dichlorofluorescein; FJB, Fluoro-Jade B.

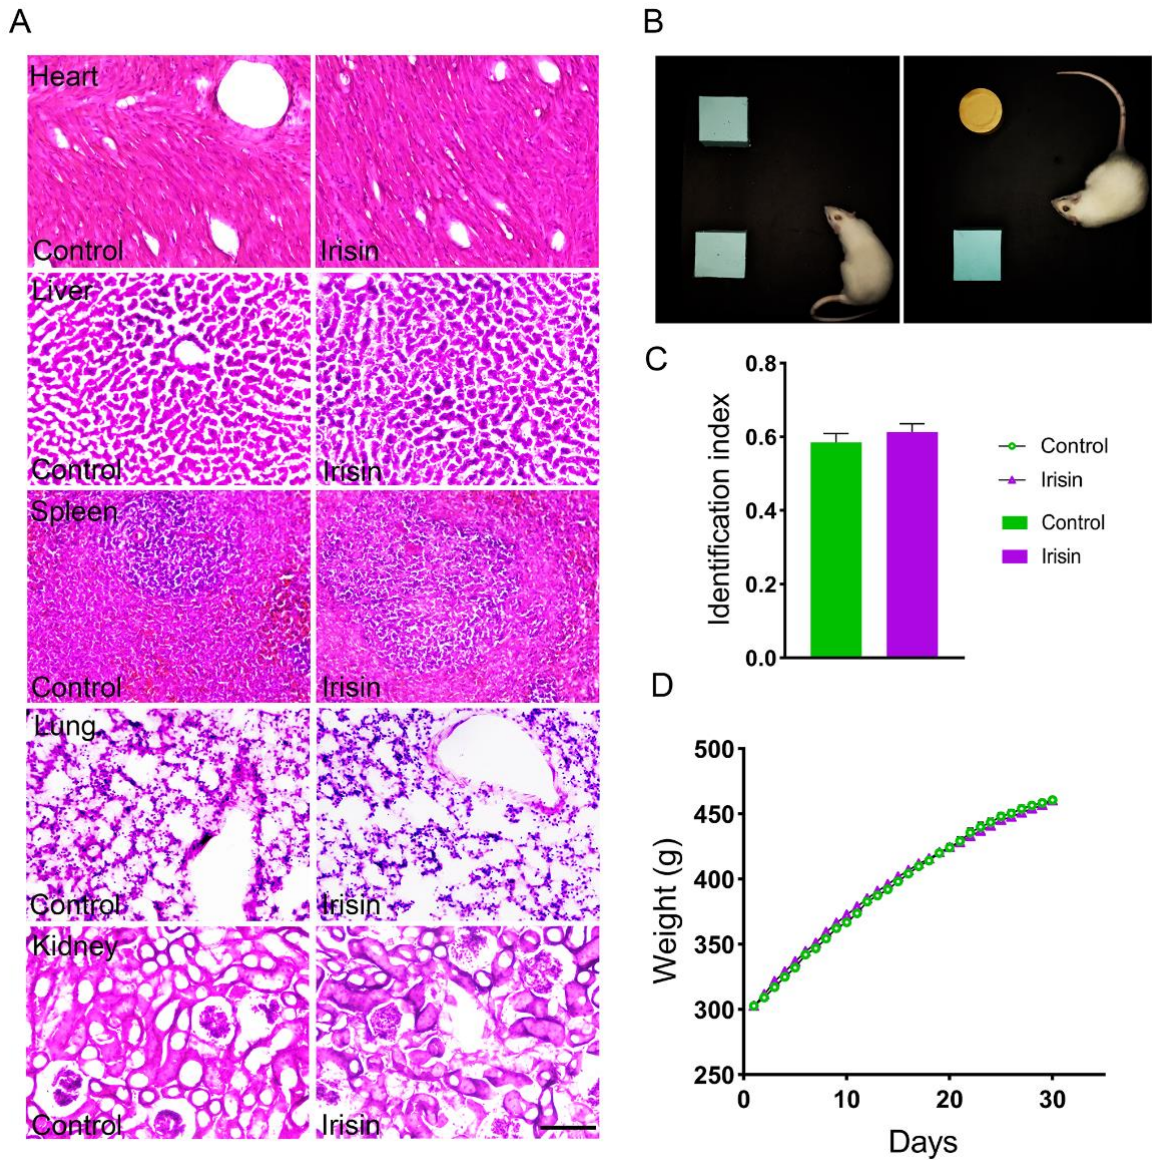

**Fig. S4** **A** HE staining of heart, liver, spleen, lung, and kidney from control and irisin groups (day 30,  $n = 8/\text{group}$ , scale bar,  $100\ \mu\text{m}$ ). **B**, **C** The novel object recognition test (**B**) and identification index (**C**) ( $n = 10/\text{group}$ , on day 30). **D** Weights of rats on a normal diet in the control and irisin groups ( $n = 8/\text{group}$ ).
